# Supplementary material
Source: MDPI journal article supplement (https://www.mdpi.com/2073-4441/14/11/1800)
Supplement: s1 [file s1]

---

*Article*

# Effective Removal of Humic Acid by Zr-MOFs with Surface Modification

Yuankang Jiang, Zhenggang Wang, Zhiping Zhu \*, Mingpeng He and Pan Zhou

School of Chemistry and Chemical Engineering, Changsha University of Science and Technology, Changsha 410114, China; 17336671180@163.com (Y.J.); zhenggangwang16@163.com (Z.W.); h18707488613@163.com (M.H.); 19109021166@stu.csust.edu.cn (P.Z.)

\* Correspondence: zhuzp@csust.edu.cn

Table S1. The applied materials properties

| Material                         | Company       | CAS number | Molecular weight (g mol <sup>-1</sup> ) | Purity (%)           | Molecular formula                                                                     |
|----------------------------------|---------------|------------|-----------------------------------------|----------------------|---------------------------------------------------------------------------------------|
| Zirconium tetrachloride          | Sinopharm     | 10036-11-6 | 233.04                                  | 98%<br>≤<br>purity   |    |
| 2-aminoterephthalic acid         | Sinopharm     | 10312-55-7 | 181.14                                  | 95%<br>≤<br>purity   |    |
| Dimethylformamide                | Sinopharm     | 68-12-2    | 73.09                                   | 99.5%<br>≤<br>purity |    |
| Sodium dodecyl benzene sulfonate | Sinopharm     | 25155-30-0 | 348.48                                  | 99.7%<br>≤<br>purity |    |
| Ethanol absolute                 | Sinopharm     | 64-17-5    | 46.07                                   | 99.7%<br>≤<br>purity |  |
| Humic acid, sodium salt          | Sigma Aldrich | 68131-04-4 | -                                       | 95%<br>≤<br>purity   |  |

---

**Table S2.** Zeta potential of HA in water under different pH

| pH           | 2        | 3       | 4        | 5        | 6       |
|--------------|----------|---------|----------|----------|---------|
| Zeta         | -16.08 ± | -0.39 ± | -33.69 ± | -41.92 ± | -35.11± |
| potential/mV | 4.02     | 0.13    | 4.20     | 3.48     | 5.86    |

---

| pH           | 7        | 8      | 9        | 10       | 11      |
|--------------|----------|--------|----------|----------|---------|
| Zeta         | -44.25 ± | -39.93 | -39.22 ± | -39.60 ± | -48.43± |
| potential/mV | 7.19     | ±4.44  | 5.87     | 5.79     | 9.04    |

---

---

Megha syam Rauthula[1] et al. inspected a sorption of HA on activated carbon as 97.35 mg g<sup>-1</sup> (pH5.6, T=303 k). Jianwei Lin[2] et al. investigated the adsorption of HA on surfactant-modified chitosan/zeolite composites and identified the adsorption capacity was 74.1 mg g<sup>-1</sup> on chitosan/zeolite composites (pH7, T=30 °C ). Jihong Wang[3] et al. investigated HA adsorption on magnetically separable polyaniline and found the capacity of 36.36 mg g<sup>-1</sup> (pH5.5-6, T=25 °C). Jianchao Wang[4] et al. prepared Graphitic Carbon Nitride derived from urea by thermal polycondensation method and tested for HA adsorption. The maximum adsorption capacity was 73.24 mg g<sup>-1</sup> (pH3, T=298K). Lingling Wang[5] et al. reported HA and Cr (VI) adsorption on ZnO-30N-zeolite as 33.4 mg g<sup>-1</sup>. Therefore, it follows that the Zr-MOF exhibits much higher adsorption capacity than other adsorbents (pH under natural conditions, T=25 °C).

---

## References

1. Rauthula, M.S..V.C. Srivastava. *Studies on adsorption/desorption of nitrobenzene and humic acid onto/from activated carbon*. Chemical engineering journal, **2011**. 168(1): p. 35-43.
2. Lin, J..Y. Zhan. *Adsorption of humic acid from aqueous solution onto unmodified and surfactant-modified chitosan/zeolite composites*. Chemical engineering journal, **2012**. 200: p. 202-213.
3. Wang, J.;L. Bi. *Removal of humic acid from aqueous solution by magnetically separable polyaniline: Adsorption behavior and mechanism*. Journal of colloid and interface science, **2014**. 430: p. 140-146.
4. Wang, J.;D. Yue. *Insights into adsorption of humic substances on graphitic carbon nitride*. Environmental Science & Technology, **2021**. 55(12): p. 7910-7919.
5. Wang, L.;D.D. Dionysiou. *Removal of humic acid and Cr (VI) from water using ZnO–30N-zeolite*. Chemosphere, **2021**. 279: p. 130491.
